# Supplementary material
Source: PubMed Central journal article supplement (PMC2909381)
Supplement: NIHMS215575-supplement-supplement_1.pdf [file NIHMS215575-supplement-supplement_1.pdf]

**Supplementary Table 1.**

**Number of missing ABR latency data points filled in with mean values**

|         | PEAK 1*      |        |          |        | PEAK 2**     |        |          |        |
|---------|--------------|--------|----------|--------|--------------|--------|----------|--------|
|         | Non-breeding |        | Breeding |        | Non-breeding |        | Breeding |        |
|         | Male         | Female | Male     | Female | Male         | Female | Male     | Female |
| Click   | 0            | 0      | 0        | 0      | 0            | 0      | 0        | 0      |
| 500 Hz  | 3            | 1      | 4        | 4      | 3            | 1      | 4        | 4      |
| 1000 Hz | 1            | 0      | 4        | 3      | 1            | 0      | 4        | 3      |
| 2000 Hz | 1            | 0      | 2        | 2      | 1            | 0      | 2        | 2      |
| 3000 Hz | 1            | 0      | 0        | 1      | 1            | 0      | 2        | 1      |
| 4000 Hz | 1            | 0      | 0        | 0      | 1            | 0      | 1        | 0      |
| 6000 Hz | 1            | 0      | 1        | 0      | 1            | 0      | 1        | 0      |
| 8000 Hz | 1            | 0      | 2        | 2      | 1            | 0      | 2        | 1      |

\* Filled in values represent 35 out of 312 total peak 1 data points (11.2%)

\*\* Filled in values represent 37 out of 312 total peak 1 data points (11.9%)

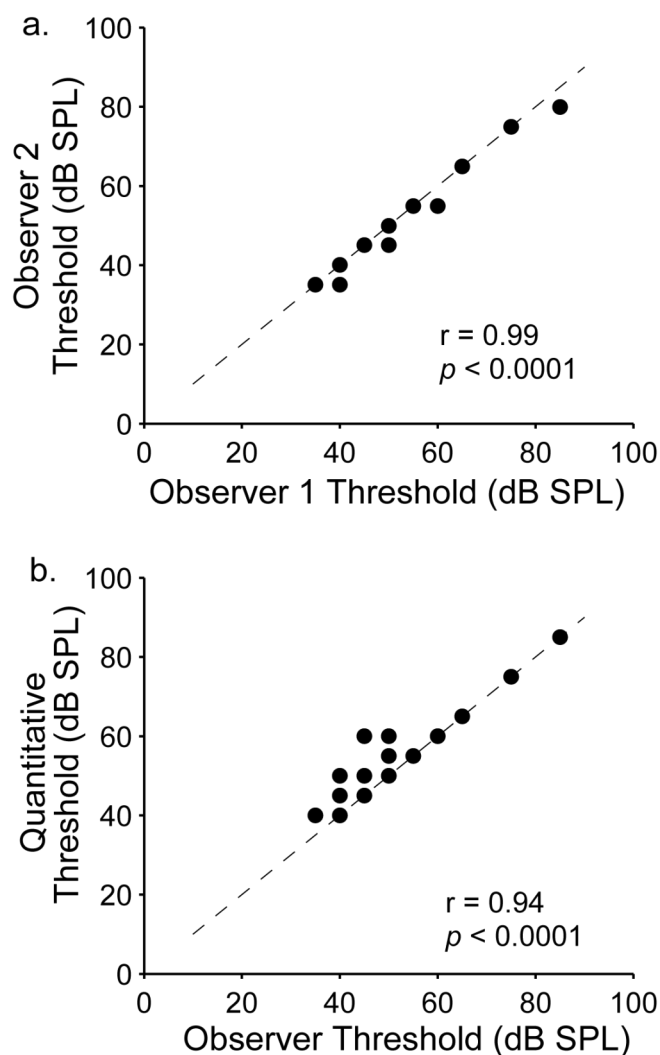

**Supplementary Fig 1.** Blind observer and quantitative analyses verify visual estimates of ABR thresholds. Each circle represents the threshold value for a representative ABR response. The dashed line represents the unity line. Pearson's  $r$  and  $p$  value are indicated for each comparison.

*a)* Blind observer threshold estimates ( $y$ -axis) for a subset (10%) of all ABR responses significantly correlate with estimates made by one author ( $x$ -axis). *b)* Visual estimates ( $x$ -axis) significantly correlate with an automated estimate ( $y$ -axis) comparing the maximum voltage response in a 10 msec post-stimulus window with the maximum pre-stimulus voltage displacement plus 2 standard deviations.

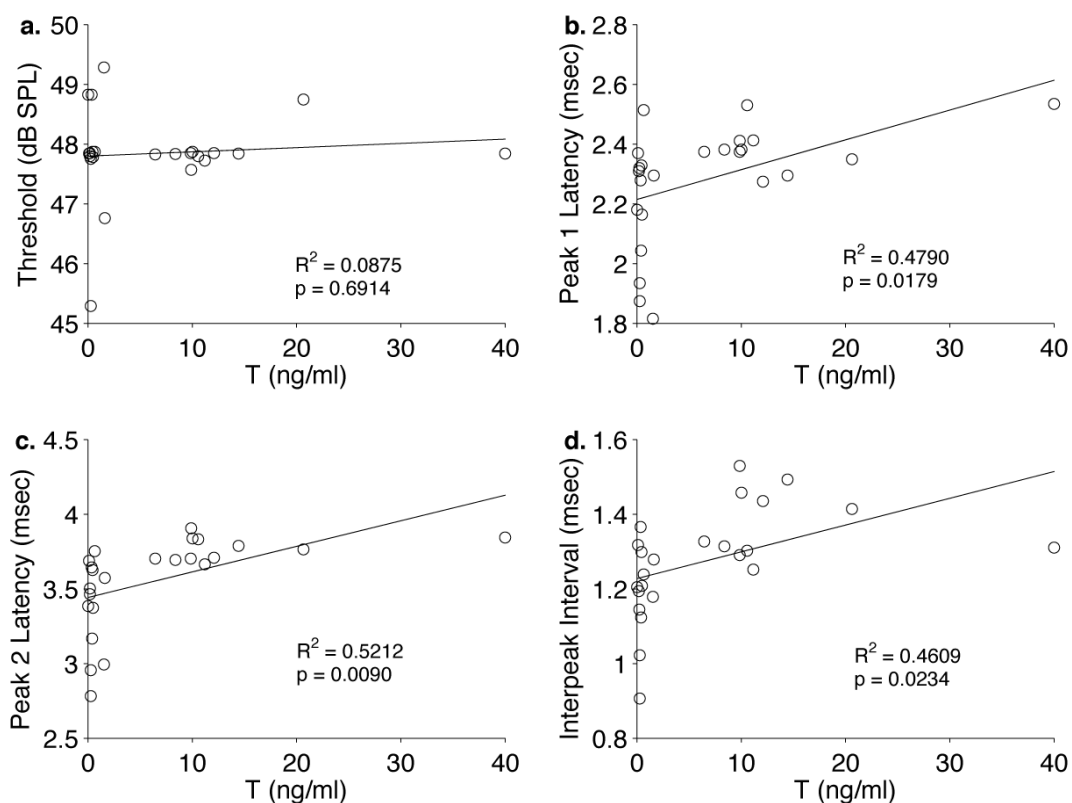

**Supplementary Fig 2.** ABR latencies, but not thresholds, correlate with male plasma T level.

*a)* Individual ABR thresholds were averaged across all stimulus frequencies to give a single threshold value for each bird. These values are plotted as a function of individual T levels.

Thresholds do not correlate with hormone level in male white-crowned sparrows. *b)* Individual iso-intensity peak 1 latencies were averaged across all stimulus frequencies to give a single peak 1 latency for each bird. Peak 1 latencies significantly correlate with T level ( $p < 0.05$ ). Similar results were found for Peak 2 latencies (*c*) and Inter-peak intervals (*d*).

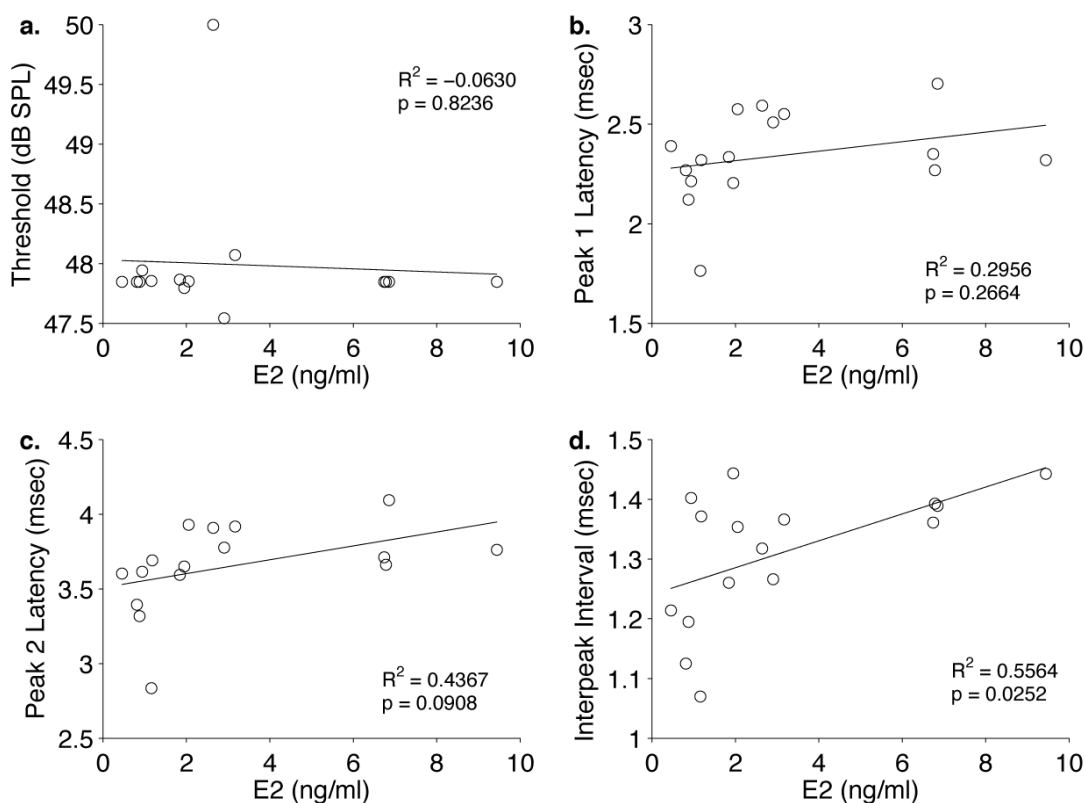

**Supplementary Fig 3.** ABR latencies and thresholds do not correlate with female plasma  $E_2$  level. *a)* Individual ABR thresholds were averaged across all stimulus frequencies to give a single threshold value for each bird. These values are plotted as a function of individual  $E_2$  levels. Thresholds do not correlate with hormone level in female white-crowned sparrows. *b)* Individual iso-intensity peak 1 latencies were averaged across all stimulus frequencies to give a single peak 1 latency for each bird. Peak 1 latencies do not significantly correlate with  $E_2$  level. Similar results were found for Peak 2 latencies (*c*) and Inter-peak intervals (*d*).

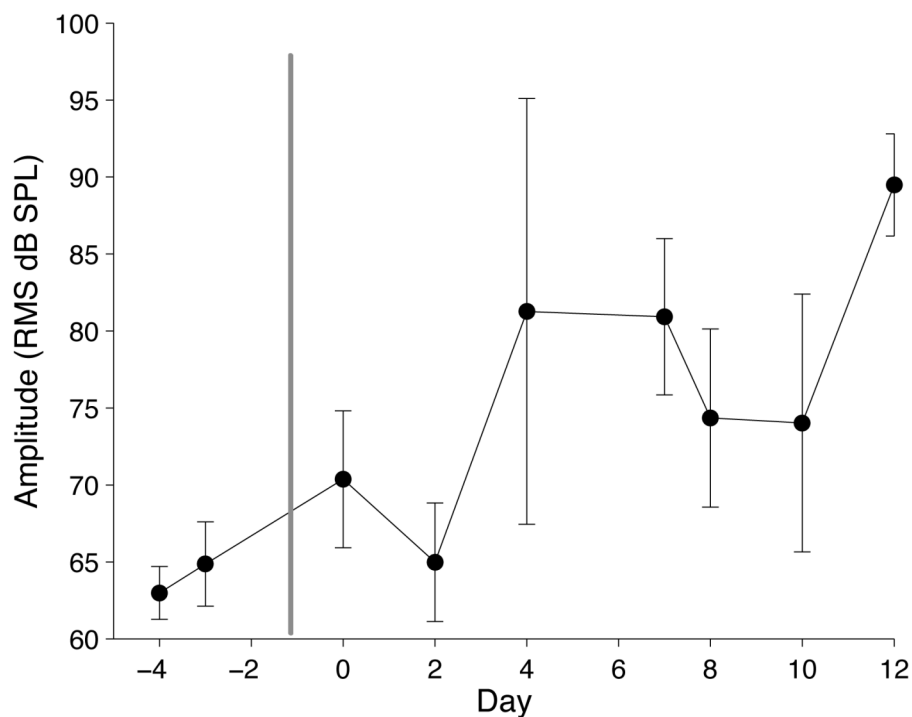

**Supplementary Fig 4.** Non-breeding songs have lower amplitudes than breeding songs. We recorded an individual male white-crowned sparrow under non-breeding conditions until day 0, at which point we implanted him with a subcutaneous T pellet and switched him to a long-day photoperiod. The vertical grey line separates songs produced under non-breeding conditions (left) from those produced during the transition into breeding (right). After exposure to breeding-like conditions, song amplitude gradually rises from 70.4 +/- 4.45 dB SPL on day 0 to 87.5 +/- 4.15 dB SPL on day 12. Data are mean +/- STDEV.
